# Supplementary figures and images for: Efficacy of BAFF inhibition and B-cell depletion in non-obese diabetic mice as a spontaneous model for Sjögren’s disease
Source: HighWire-hosted journal article supplement (doi:10.1136/rmdopen-2024-004112), 2024-08-01

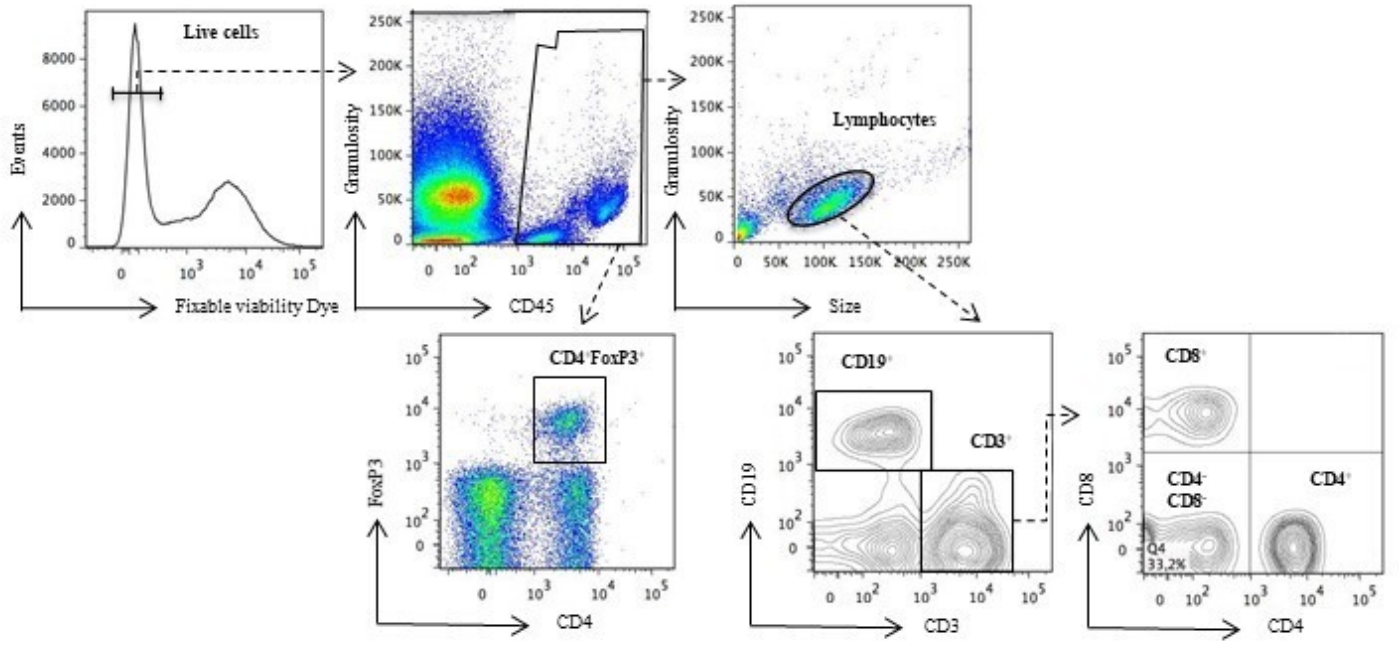

Supplement: rmdopen-2024-004112supp001_data_supplement.pdf [file rmdopen-2024-004112supp001_data_supplement.pdf]
